# Supplementary material for: Network pharmacology combined with functional metabolomics discover bile acid metabolism as a promising target for mirabilite against colorectal cancer
Source: Royal Society of Chemistry journal article supplement (doi:10.1039/c8ra04886j), 2018-01-01
Supplement: c8ra04886j1.pdf [file c8ra04886j1.pdf]

Table S1 The canonical pathways by IPA analysis

| Ingenuity Canonical Pathways            | $-\log(p\text{-value})$ | Ratio  | Molecules                                       |
|-----------------------------------------|-------------------------|--------|-------------------------------------------------|
| FXR/RXR Activation                      | 5.47                    | 0.273  | deoxycholate,chenodeoxycholic acid,choleic acid |
| Taurine Biosynthesis                    | 1.68                    | 0.167  | taurine                                         |
| Hepatic Cholestasis                     | 1.29                    | 0.0667 | chenodeoxycholic acid                           |
| Bile Acid Biosynthesis, Neutral Pathway | 0.921                   | 0.0278 | taurine                                         |

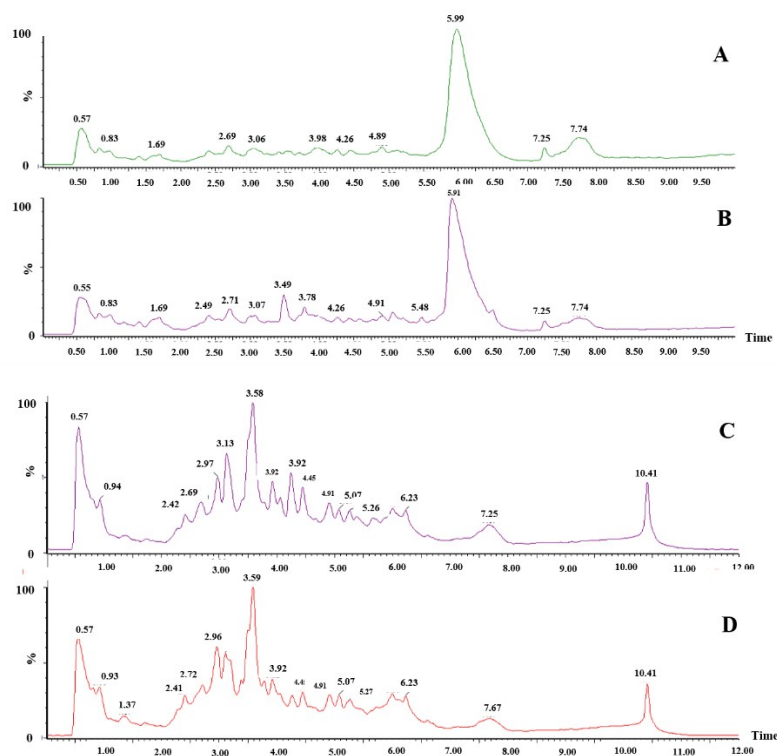

Figure S1 The BPI spectrum of the urine samples between the control group and model group on the 70<sup>th</sup> day

A. The BPI spectrum of the control group in the positive ion mode; B. The BPI spectrum of the model group in the positive ion mode; C. The BPI spectrum of the control group in the negative ion mode; D. The BPI spectrum of the control group in the negative ion mode.

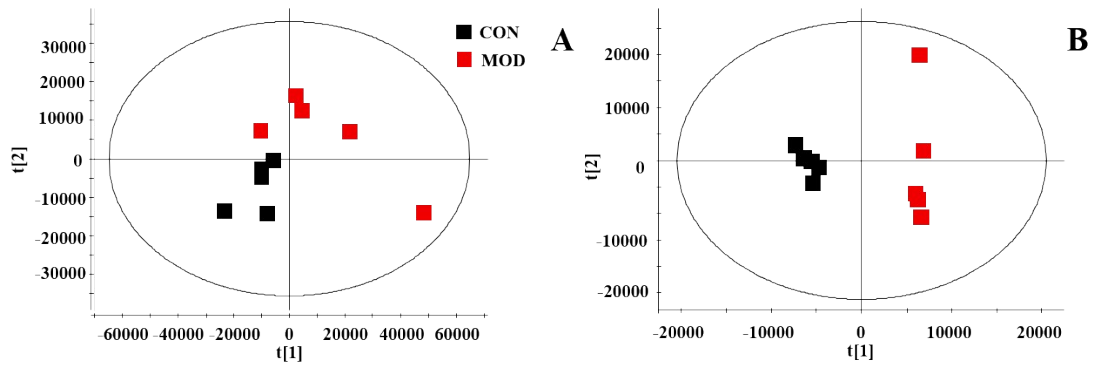

Figure S2 The OPLS-DA plot between the control group and the model group  
 A. 2D OPLS-DA plot in the positive ion mode. Red squares represent model groups and black squares represent control groups. B. 2D OPLS-DA plot in the negative ion mode.

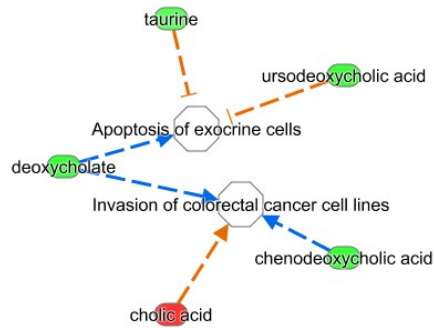

Figure S3 The relationship of chenodeoxycholic acid and CRC cell lines
